# Supplementary material for: Analysis of 26 STRs loci (PowerPlex® Fusion 6C System) in Mestizos from the Mexico City
Source: Research Square preprint supplement (doi:10.21203/rs.3.rs-3856134/v1), 2024-01-16
Supplement: Supplementary file 1 [file 30b3e460f94b63ba6db9b3b0.docx]

**Table 1.** Allele frequencies, forensic parameters and HWE values of Mexico City based on 26 STRs.

|  | CSF1PO | D10S1248 | D12S391 | D13S317 | D16S539 | D18S51 | D19S433 | D1S1656 | D21S11 | D22S1045 | D2S1338 | D2S441 | D3S1358 | D5S818 | D7S820 | D8S1179 | FGA | PentaD | PentaE | SE33 | TH01 | TPOX | vWA | DYS391 | DYS570 | DYS576 |
| --- | --- | --- | --- | --- | --- | --- | --- | --- | --- | --- | --- | --- | --- | --- | --- | --- | --- | --- | --- | --- | --- | --- | --- | --- | --- | --- |
| 2.2 |  |  |  |  |  |  |  |  |  |  |  |  |  |  |  |  |  | 0.0058 |  |  |  |  |  |  |  |  |
| 4 |  |  |  |  |  |  |  |  |  |  |  |  |  |  |  |  |  |  |  |  | 0.0008 |  |  |  |  |  |
| 5 |  |  |  |  |  |  |  |  |  |  |  |  |  |  |  |  |  | 0.0008 | 0.0183 |  | 0.0033 |  |  |  |  |  |
| 6 |  |  |  |  |  |  |  |  |  |  |  |  |  |  |  |  |  |  |  |  | 0.3222 | 0.0033 |  |  |  |  |
| 6.3 |  |  |  |  |  |  |  |  |  |  |  |  |  |  |  |  |  |  |  | 0.0008 | 0.0008 |  |  |  |  |  |
| 7 | 0.0033 |  |  |  |  |  |  |  |  |  |  |  |  | 0.0683 | 0.0092 | 0.0008 |  | 0.0025 | 0.0492 |  | 0.3598 | 0.0008 |  |  |  |  |
| 7.3 |  |  |  |  |  |  |  |  |  |  |  |  |  |  |  |  |  |  |  |  |  | 0.0008 |  |  |  |  |
| 8 | 0.0058 |  |  | 0.0750 | 0.0050 |  |  |  |  |  |  | 0.0008 |  | 0.0025 | 0.0927 | 0.0050 |  | 0.0175 | 0.0275 |  | 0.0434 | 0.5050 |  |  |  |  |
| 9 | 0.0233 |  |  | 0.2500 | 0.0883 | 0.0008 | 0.0008 |  |  |  |  | 0.0050 |  | 0.0500 | 0.0376 | 0.0025 |  | 0.1642 | 0.0050 | 0.0008 | 0.0735 | 0.0384 |  | 0.0845 |  |  |
| 9.3 |  |  |  |  |  |  |  |  |  |  |  |  |  |  |  |  |  |  |  |  | 0.1870 |  |  |  |  |  |
| 10 | 0.2450 | 0.0033 |  | 0.1142 | 0.2192 | 0.0025 | 0.0025 | 0.0025 |  | 0.0025 | 0.0008 | 0.5033 |  | 0.0517 | 0.2337 | 0.0900 |  | 0.2333 | 0.0308 |  | 0.0067 | 0.0492 |  | 0.5967 | 0.0027 |  |
| 10.3 |  |  |  |  |  |  |  |  |  |  |  |  |  |  | 0.0008 |  |  |  |  |  | 0.0025 |  |  |  |  |  |
| 11 | 0.2700 | 0.0025 |  | 0.1692 | 0.2767 | 0.0067 | 0.0058 | 0.0183 |  | 0.0519 |  | 0.2546 |  | 0.5125 | 0.3347 | 0.0358 |  | 0.1358 | 0.0567 |  |  | 0.2621 |  | 0.3106 |  |  |
| 11.2 |  |  |  |  |  |  | 0.0025 |  |  |  |  |  |  |  |  |  |  |  |  | 0.0008 |  |  |  |  |  |  |
| 11.3 |  |  |  |  |  |  |  |  |  |  |  | 0.0267 |  |  |  |  |  |  |  |  |  |  |  |  |  |  |
| 12 | 0.3958 | 0.0175 |  | 0.2067 | 0.2908 | 0.1067 | 0.0433 | 0.0475 |  | 0.0017 |  | 0.0392 |  | 0.2425 | 0.2304 | 0.1175 |  | 0.1725 | 0.1867 | 0.0008 |  | 0.1386 |  | 0.0082 |  |  |
| 12.2 |  |  |  |  |  |  | 0.0225 |  |  |  |  |  |  |  |  |  |  |  |  |  |  |  |  |  |  |  |
| 13 | 0.0550 | 0.2775 |  | 0.1167 | 0.1050 | 0.1125 | 0.1750 | 0.1042 |  | 0.0042 |  | 0.0058 | 0.0108 | 0.0675 | 0.0559 | 0.3442 |  | 0.2075 | 0.0750 | 0.0050 |  | 0.0017 | 0.0017 |  | 0.0027 | 0.0027 |
| 13.1 |  |  |  |  |  |  |  |  |  |  |  | 0.0008 |  |  |  |  |  |  |  |  |  |  |  |  |  |  |
| 13.2 |  |  |  |  |  |  | 0.1283 |  |  |  |  |  |  |  |  | 0.0008 |  |  |  |  |  |  |  |  |  |  |
| 14 | 0.0008 | 0.3950 |  | 0.0675 | 0.0142 | 0.1875 | 0.2608 | 0.1092 |  | 0.0168 |  | 0.1469 | 0.0550 | 0.0050 | 0.0050 | 0.2608 |  | 0.0517 | 0.0800 | 0.0225 |  |  | 0.0409 |  | 0.0027 | 0.0054 |
| 14.2 |  |  |  |  |  |  | 0.0625 |  |  |  |  |  |  |  |  |  |  |  |  |  |  |  |  |  |  |  |
| 14.3 |  |  |  |  |  |  |  | 0.0017 |  |  |  |  | 0.0008 |  |  |  |  |  |  |  |  |  |  |  |  |  |
| 15 | 0.0008 | 0.2167 | 0.0150 | 0.0008 | 0.0008 | 0.1483 | 0.1217 | 0.1750 |  | 0.4774 |  | 0.0150 | 0.4650 |  |  | 0.1175 |  | 0.0067 | 0.1450 | 0.0500 |  |  | 0.0760 |  | 0.0327 | 0.0245 |
| 15.2 |  |  |  |  |  |  | 0.0908 |  |  |  |  |  |  |  |  |  |  |  |  | 0.0008 |  |  |  |  |  |  |
| 15.3 |  |  |  |  |  |  |  | 0.0225 |  |  |  |  |  |  |  |  |  |  |  |  |  |  |  |  |  |  |
| 16 |  | 0.0750 | 0.0259 |  |  | 0.1092 | 0.0400 | 0.2158 |  | 0.3811 | 0.0158 | 0.0017 | 0.2867 |  |  | 0.0208 |  | 0.0008 | 0.1108 | 0.0725 |  |  | 0.3773 |  | 0.1798 | 0.1035 |
| 16.1 |  |  |  |  |  |  |  |  |  |  |  |  |  |  |  |  | 0.0008 |  |  |  |  |  |  |  |  |  |
| 16.2 |  |  |  |  |  |  | 0.0400 |  |  |  |  |  |  |  |  |  |  |  |  | 0.0058 |  |  |  |  |  |  |
| 16.3 |  |  |  |  |  |  |  | 0.0442 |  |  |  |  |  |  |  |  |  |  |  |  |  |  |  |  |  |  |
| 17 |  | 0.0083 | 0.0601 |  |  | 0.1775 |  | 0.0500 |  | 0.0570 | 0.1367 |  | 0.1200 |  |  | 0.0033 |  |  | 0.0633 | 0.0792 |  |  | 0.3080 |  | 0.3079 | 0.1962 |
| 17.2 |  |  |  |  |  |  | 0.0025 |  |  |  |  |  |  |  |  |  |  |  |  | 0.0008 |  |  |  |  |  |  |
| 17.3 |  |  | 0.0075 |  |  |  |  | 0.1617 |  |  |  |  |  |  |  |  |  |  |  | 0.0025 |  |  |  |  |  |  |
| 18 |  | 0.0042 | 0.1636 |  |  | 0.0658 | 0.0008 | 0.0083 |  | 0.0059 | 0.0533 |  | 0.0583 |  |  | 0.0008 | 0.0067 | 0.0008 | 0.0367 | 0.0967 |  |  | 0.1294 |  | 0.2125 | 0.3597 |
| 18.2 |  |  |  |  |  |  |  |  |  |  |  |  |  |  |  |  | 0.0008 |  |  |  |  |  |  |  |  |  |
| 18.3 |  |  | 0.0033 |  |  |  |  | 0.0342 |  |  |  |  |  |  |  |  |  |  |  | 0.0008 |  |  |  |  |  |  |
| 19 |  |  | 0.2688 |  |  | 0.0375 |  |  |  | 0.0017 | 0.2617 |  | 0.0033 |  |  |  | 0.0758 |  | 0.0242 | 0.0700 |  |  | 0.0609 |  | 0.1635 | 0.1962 |
| 19.2 |  |  |  |  |  |  |  |  |  |  |  |  |  |  |  |  |  |  |  | 0.0008 |  |  |  |  |  |  |
| 19.3 |  |  | 0.0092 |  |  |  |  | 0.0042 |  |  |  |  |  |  |  |  |  |  |  |  |  |  |  |  |  |  |
| 20 |  |  | 0.2554 |  |  | 0.0192 |  |  | 0.0008 |  | 0.1492 |  |  |  |  |  | 0.0750 |  | 0.0425 | 0.0525 |  |  | 0.0042 |  | 0.0463 | 0.0763 |
| 20.2 |  |  |  |  |  |  |  |  |  |  |  |  |  |  |  |  |  |  |  | 0.0025 |  |  |  |  |  |  |
| 20.3 |  |  |  |  |  |  |  | 0.0008 |  |  |  |  |  |  |  |  |  |  |  |  |  |  |  |  |  |  |
| 21 |  |  | 0.0826 |  |  | 0.0100 |  |  |  |  | 0.0133 |  |  |  |  |  | 0.1100 |  | 0.0217 | 0.0192 |  |  | 0.0017 |  | 0.0272 | 0.0218 |
| 21.1 |  |  |  |  |  |  |  |  |  |  |  |  |  |  |  |  |  |  |  | 0.0008 |  |  |  |  |  |  |
| 21.2 |  |  |  |  |  |  |  |  |  |  |  |  |  |  |  |  | 0.0008 |  |  | 0.0075 |  |  |  |  |  |  |
| 22 |  |  | 0.0509 |  |  | 0.0083 |  |  |  |  | 0.0867 |  |  |  |  |  | 0.1108 |  | 0.0150 | 0.0092 |  |  |  |  | 0.0136 | 0.0109 |
| 22.2 |  |  |  |  |  |  |  |  |  |  |  |  |  |  |  |  | 0.0033 |  |  | 0.0083 |  |  |  |  |  |  |
| 23 |  |  | 0.0334 |  |  | 0.0017 |  |  |  |  | 0.1775 |  |  |  |  |  | 0.1242 |  | 0.0067 | 0.0017 |  |  |  |  | 0.0082 |  |
| 23.2 |  |  |  |  |  |  |  |  |  |  |  |  |  |  |  |  | 0.0067 |  |  | 0.0167 |  |  |  |  |  |  |
| 24 |  |  | 0.0125 |  |  | 0.0008 |  |  |  |  | 0.0617 |  |  |  |  |  | 0.1650 |  | 0.0025 |  |  |  |  |  |  | 0.0027 |
| 24.2 |  |  |  |  |  |  |  |  |  |  |  |  |  |  |  |  |  |  |  | 0.0192 |  |  |  |  |  |  |
| 25 |  |  | 0.0092 |  |  | 0.0050 |  |  |  |  | 0.0358 |  |  |  |  |  | 0.1758 |  | 0.0017 |  |  |  |  |  |  |  |
| 25.2 |  |  |  |  |  |  |  |  | 0.0008 |  |  |  |  |  |  |  |  |  |  | 0.0433 |  |  |  |  |  |  |
| 26 |  |  | 0.0025 |  |  |  |  |  | 0.0017 |  | 0.0050 |  |  |  |  |  | 0.1108 |  | 0.0008 | 0.0017 |  |  |  |  |  |  |
| 26.2 |  |  |  |  |  |  |  |  |  |  |  |  |  |  |  |  |  |  |  | 0.0875 |  |  |  |  |  |  |
| 26.21 |  |  |  |  |  |  |  |  |  |  |  |  |  |  |  |  |  |  |  | 0.0008 |  |  |  |  |  |  |
| 27 |  |  |  |  |  |  |  |  | 0.0100 |  | 0.0025 |  |  |  |  |  | 0.0283 |  |  |  |  |  |  |  |  |  |
| 27.2 |  |  |  |  |  |  |  |  |  |  |  |  |  |  |  |  |  |  |  | 0.0850 |  |  |  |  |  |  |
| 28 |  |  |  |  |  |  |  |  | 0.0517 |  |  |  |  |  |  |  | 0.0050 |  |  |  |  |  |  |  |  |  |
| 28.2 |  |  |  |  |  |  |  |  |  |  |  |  |  |  |  |  |  |  |  | 0.0800 |  |  |  |  |  |  |
| 29 |  |  |  |  |  |  |  |  | 0.1808 |  |  |  |  |  |  |  |  |  |  | 0.0017 |  |  |  |  |  |  |
| 29.2 |  |  |  |  |  |  |  |  | 0.0058 |  |  |  |  |  |  |  |  |  |  | 0.0617 |  |  |  |  |  |  |
| 30 |  |  |  |  |  |  |  |  | 0.3133 |  |  |  |  |  |  |  |  |  |  |  |  |  |  |  |  |  |
| 30.2 |  |  |  |  |  |  |  |  | 0.0125 |  |  |  |  |  |  |  |  |  |  | 0.0508 |  |  |  |  |  |  |
| 31 |  |  |  |  |  |  |  |  | 0.0825 |  |  |  |  |  |  |  |  |  |  | 0.0008 |  |  |  |  |  |  |
| 31.2 |  |  |  |  |  |  |  |  | 0.1175 |  |  |  |  |  |  |  |  |  |  | 0.0200 |  |  |  |  |  |  |
| 32 |  |  |  |  |  |  |  |  | 0.0125 |  |  |  |  |  |  |  |  |  |  | 0.0008 |  |  |  |  |  |  |
| 32.2 |  |  |  |  |  |  |  |  | 0.1442 |  |  |  |  |  |  |  |  |  |  | 0.0067 |  |  |  |  |  |  |
| 33.1 |  |  |  |  |  |  |  |  | 0.0008 |  |  |  |  |  |  |  |  |  |  |  |  |  |  |  |  |  |
| 33.2 |  |  |  |  |  |  |  |  | 0.0550 |  |  |  |  |  |  |  |  |  |  | 0.0042 |  |  |  |  |  |  |
| 34 |  |  |  |  |  |  |  |  | 0.0008 |  |  |  |  |  |  |  |  |  |  | 0.0042 |  |  |  |  |  |  |
| 34.2 |  |  |  |  |  |  |  |  | 0.0042 |  |  |  |  |  |  |  |  |  |  |  |  |  |  |  |  |  |
| 35 |  |  |  |  |  |  |  |  | 0.0017 |  |  |  |  |  |  |  |  |  |  | 0.0017 |  |  |  |  |  |  |
| 35.2 |  |  |  |  |  |  |  |  | 0.0017 |  |  |  |  |  |  |  |  |  |  |  |  |  |  |  |  |  |
| 36 |  |  |  |  |  |  |  |  | 0.0017 |  |  |  |  |  |  |  |  |  |  |  |  |  |  |  |  |  |
| 38 |  |  |  |  |  |  |  |  |  |  |  |  |  |  |  |  |  |  |  | 0.0008 |  |  |  |  |  |  |
| MAF | 0.0042 | 0.0042 | 0.0042 | 0.0042 | 0.0042 | 0.0042 | 0.0042 | 0.0042 | 0.0042 | 0.0042 | 0.0042 | 0.0042 | 0.0042 | 0.0042 | 0.0042 | 0.0042 | 0.0042 | 0.0042 | 0.0042 | 0.0042 | 0.0042 | 0.0042 | 0.0042 | 0.0068 | 0.0068 | 0.0068 |
| GD | 0.7074 | 0.7146 | 0.8210 | 0.8300 | 0.7724 | 0.8698 | 0.8530 | 0.8658 | 0.8222 | 0.6211 | 0.8439 | 0.6583 | 0.6812 | 0.6647 | 0.7677 | 0.7767 | 0.8782 | 0.8250 | 0.9044 | 0.9379 | 0.7251 | 0.6537 | 0.7355 | 0.5417 | 0.7989 | 0.778 |
| PIC | 0.6543 | 0.6647 | 0.7983 | 0.8072 | 0.7352 | 0.8550 | 0.8366 | 0.8509 | 0.8011 | 0.5497 | 0.8252 | 0.6094 | 0.6324 | 0.6238 | 0.7312 | 0.7450 | 0.8649 | 0.8002 | 0.8963 | 0.9335 | 0.6773 | 0.6030 | 0.6942 | 0.465 | 0.7682 | 0.7455 |
| PD | 0.8644 | 0.8685 | 0.9419 | 0.9481 | 0.9101 | 0.9657 | 0.9627 | 0.9672 | 0.9459 | 0.8002 | 0.9571 | 0.8267 | 0.8562 | 0.8457 | 0.9113 | 0.9132 | 0.9711 | 0.9427 | 0.9827 | 0.9911 | 0.8715 | 0.8209 | 0.8889 | 0.5402 | 0.7967 | 0.7759 |
| Het | 0.6800 | 0.7033 | 0.8197 | 0.8200 | 0.7550 | 0.8717 | 0.8233 | 0.8700 | 0.8600 | 0.5779 | 0.8133 | 0.6928 | 0.6600 | 0.6500 | 0.7279 | 0.7817 | 0.8583 | 0.7983 | 0.8550 | 0.9267 | 0.7429 | 0.6561 | 0.7446 | 0.5402 | 0.7967 | 0.7759 |
| PE | 0.3980 | 0.4334 | 0.6361 | 0.6367 | 0.5184 | 0.7380 | 0.6430 | 0.7346 | 0.7147 | 0.2652 | 0.6240 | 0.4172 | 0.3691 | 0.3552 | 0.4727 | 0.5655 | 0.7114 | 0.5960 | 0.7047 | 0.8502 | 0.4977 | 0.3637 | 0.5005 | 0.5402 | 0.7967 | 0.7759 |
