# Supplementary material for: Analysis of 26 STRs loci (PowerPlex® Fusion 6C System) in Mestizos from the Mexico City
Source: Research Square preprint supplement (doi:10.21203/rs.3.rs-3856134/v1), 2024-01-16
Supplement: Supplementary file 3 [file aa4ae3fda4254e3d4089d8f5.xlsx]

## Sheet: 22 STRs
		CDMX_Mx	West_Mx	Monterrey_Mx	African_Am	Caucasian_Am	Hispanic_Am
	CDMX_Mx	-	0	0	0	0	0
	West_Mx	0.00222	-	0	0	0	0
	Monterrey_Mx	0.0011	0.00081	-	0	0	0
	African_Am	0.03777	0.02447	0.02939	-	0	0
	Caucasian_Am	0.02397	0.01321	0.01701	0.02102	-	0
	Hispanic_Am	0.02282	0.01476	0.01757	0.0265	0.01503	-

## Sheet: 23 STRs
				CDMX	African	Caucasian	Hispanic
			CDMX	0
			African	0.036931	0
			Caucasian	0.023141	0.02059	0
			Hispanic	0.0219	0.025741	0.0144	0
