# Supplementary material for: Analysis of 26 STRs loci (PowerPlex® Fusion 6C System) in Mestizos from the Mexico City
Source: Research Square preprint supplement (doi:10.21203/rs.3.rs-3856134/v1), 2024-01-16
Supplement: Supplementary file 4 [file c84b96ad069a47e4771f8f58.xlsx]

## Sheet: Y-STRs CDMX_Hap Freq
Table S2. Haplotype diversity of 3 Y-STRs in Mestizo population from the Mexico City (n= 366).
DYS391	DYS576	DYS570	n
10	14	16	1
10	14	17	1
10	15	16	1
10	15	17	4
10	15	19	2
10	16	16	2
10	16	17	8
10	16	18	8
10	16	19	4
10	16	20	2
10	16	21	1
10	17	15	1
10	17	16	11
10	17	17	14
10	17	18	5
10	17	19	6
10	17	20	2
10	17	21	1
10	17	22	1
10	17	23	1
10	18	10	1
10	18	15	1
10	18	16	14
10	18	17	21
10	18	18	19
10	18	19	11
10	18	20	8
10	18	21	3
10	19	13	1
10	19	15	4
10	19	16	8
10	19	17	10
10	19	18	9
10	19	19	9
10	19	20	2
10	19	21	1
10	20	15	1
10	20	16	4
10	20	17	3
10	20	18	4
10	20	19	2
10	20	20	1
10	21	18	3
10	22	16	1
10	22	18	1
10	24	18	1
11	13	16	1
11	15	18	1
11	15	21	1
11	16	17	5
11	16	18	2
11	16	19	4
11	17	15	1
11	17	16	7
11	17	17	10
11	17	18	3
11	17	19	2
11	17	20	1
11	18	14	1
11	18	16	9
11	18	17	17
11	18	18	6
11	18	19	8
11	18	20	1
11	18	21	2
11	19	15	3
11	19	16	2
11	19	17	5
11	19	18	1
11	19	19	6
11	20	16	1
11	20	17	5
11	20	18	4
11	21	16	1
11	21	17	2
11	21	18	1
11	22	18	1
12	17	17	1
12	18	17	1
12	20	15	1
9	16	18	1
9	16	21	1
9	17	19	3
9	17	22	1
9	17	23	1
9	18	16	1
9	18	17	1
9	18	18	3
9	18	19	2
9	18	22	1
9	18	23	1
9	19	16	2
9	19	17	4
9	19	18	3
9	19	22	2
9	20	17	1
9	20	18	1
9	21	18	1
9	22	19	1
	Discriminatory capacity		0.270492
